# Supplementary material for: Effects of Accumulated And Transient Heat Exposure On Schizophrenia Hospitalizations: A Time-Series Analysis On Hourly Temperature Basis
Source: Research Square preprint supplement (doi:10.21203/rs.3.rs-537946/v1), 2021-06-09
Supplement: Supplementary file 1 [file 834d8164c1716cf8d66bc8a5.docx]

**Supplementary materials**

**Effects of accumulated and** **transient heat exposure on schizophrenia hospitalizations: a time-series analysis on hourly temperature basis**

Chao Tanga,b, Yifu Jic, Qingru Lia,b, Zhenhai Yaod, Jian Chenga,b, Yangyang Hea,b, Xiangguo Liua,b, Rubing Pana,b, Qiannan Weia,b, Weizhuo Yia,b, Hong Sua, b,∗,

a Department of Epidemiology and Health Statistics, School of Public Health, Anhui Medical University, Hefei, Anhui 230032, China.

b Anhui Provincial Laboratory of Inflammatory and Immune Diseases, Hefei, Anhui 230032, China.

c Anhui Mental Health Center, Hefei, Anhui 230032, China.

d Anhui public meteorological service center, Hefei, Anhui 230011, China.

∗ **Corresponding author:**

Hong Su, Department of Epidemiology and Health Statistics, School of Public Health, Anhui Medical University, 81 Meishan Road, Hefei, Anhui 230032, China. Tel.: +86 55163869140; E-mail address: suhong5151@sina.com.


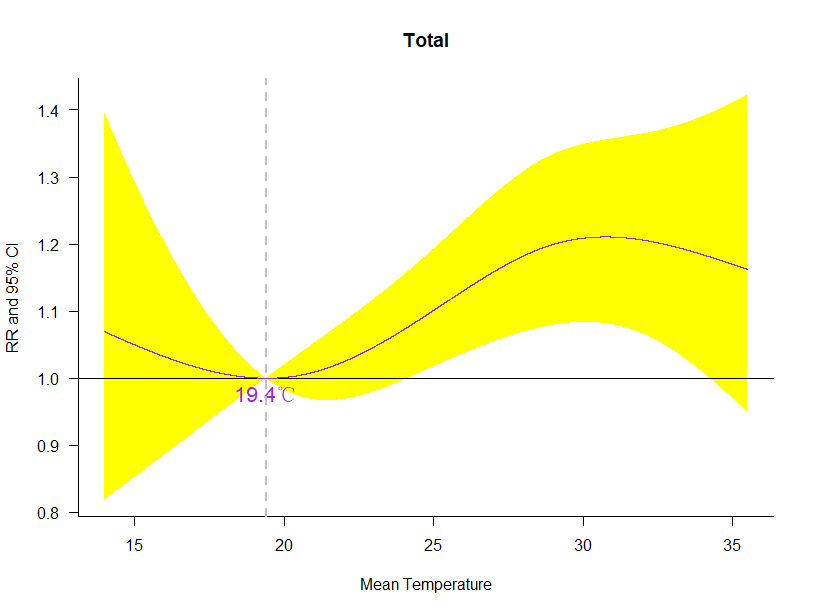


**Fig. 1.** The exposure-response curve of daily mean temperature on schizophrenia hospitalizations during the warm season from 2005-2019 in Hefei, China.


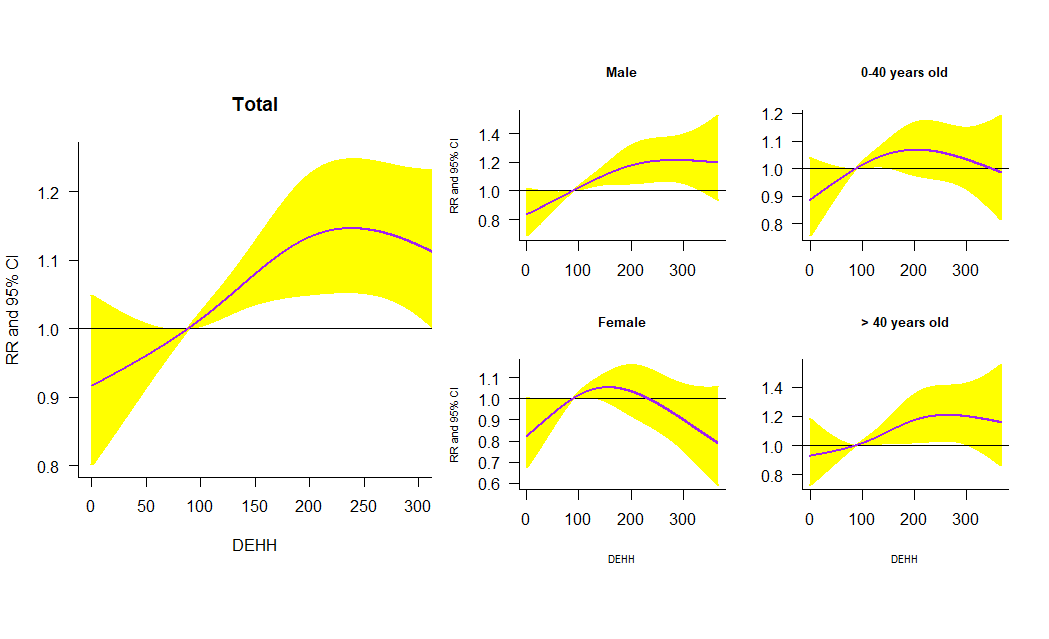


**Fig. 2.** The exposure-response relationship of daily excess heat hourly (DEHH) on total schizophrenia hospitalizations and subgroups during the warm season from 2005-2019 in Hefei, China.


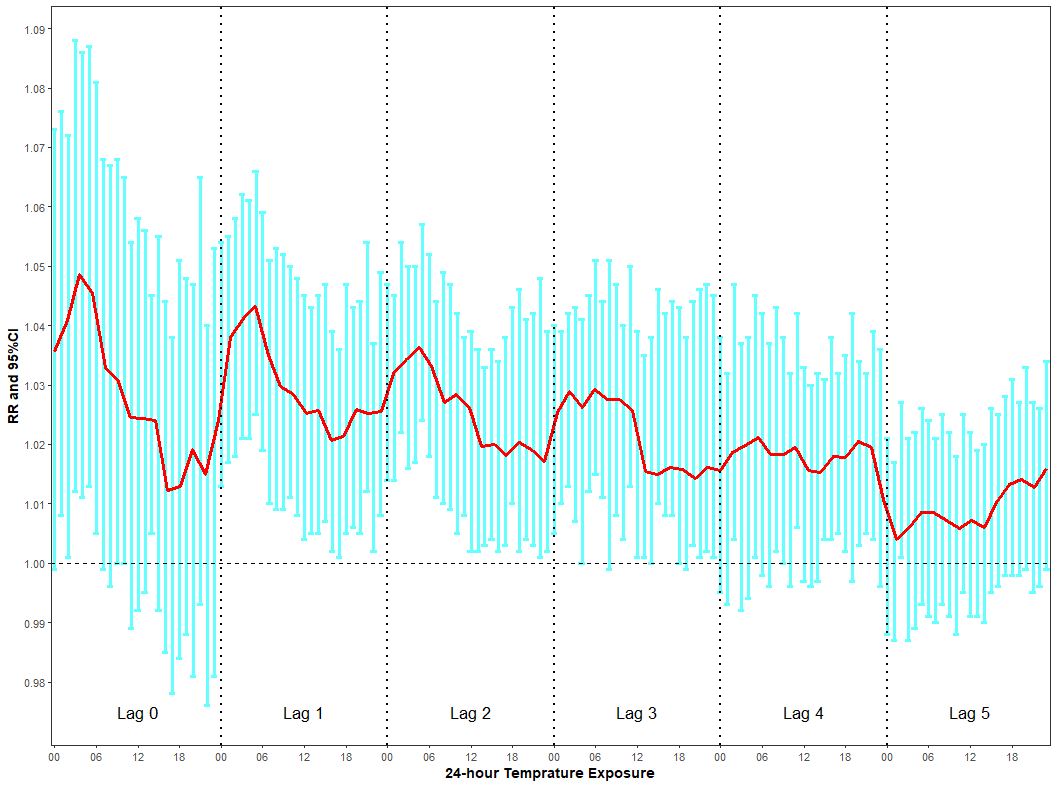


**Fig. 3.** The effects of temperature observation time on heat-schizophrenia relationships from lag 0 to lag 5 during the warm season from 2005-2019 in Hefei, China.


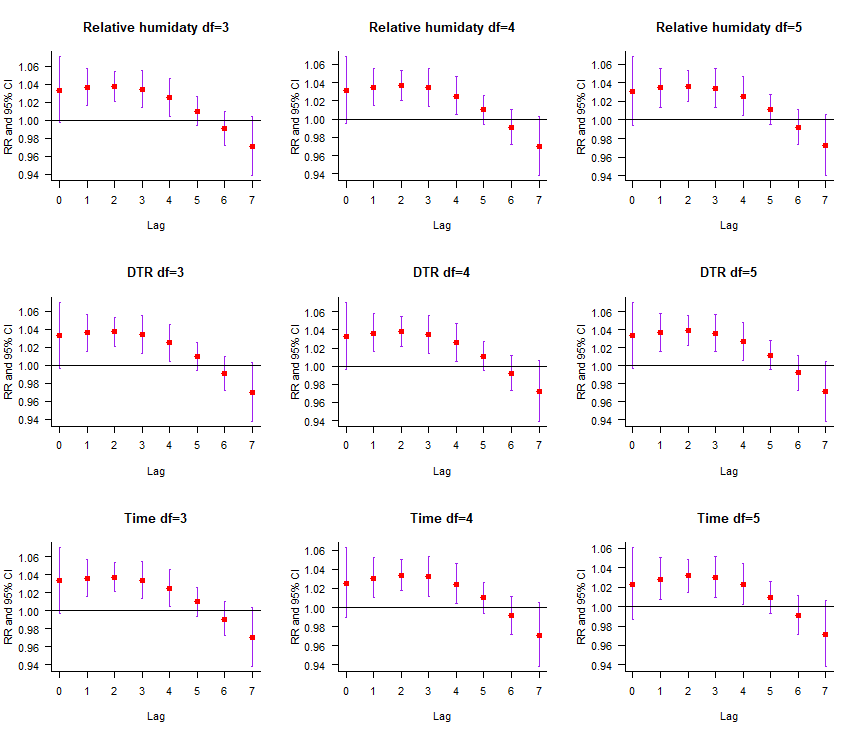


**Fig. 4.** The lag effects of daily excess heat hourly (DEHH) on schizophrenia hospitalizations after changing *df* for relative humidity (3-5), diurnal temperature range (DTR) (3-5) and time (3-5) in the sensitivity analysis.


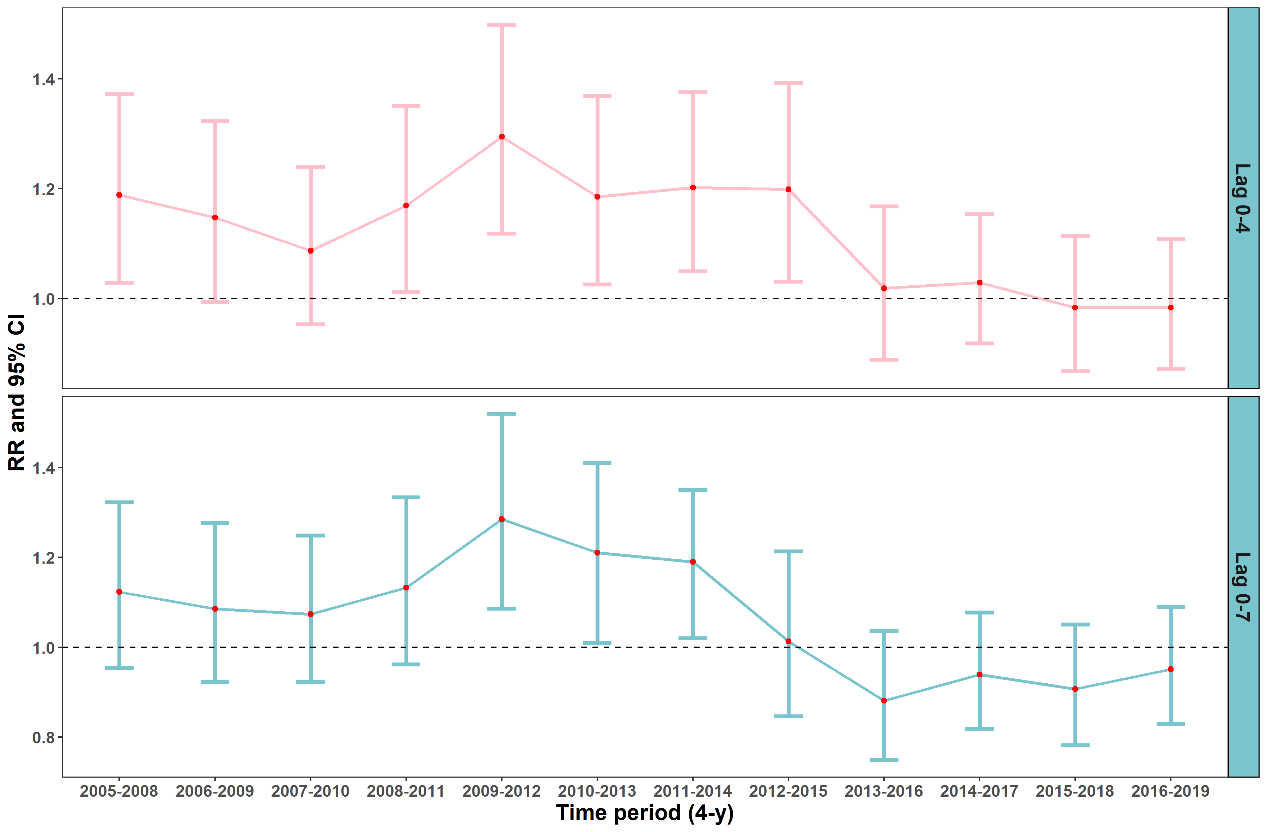


**Fig. 5.** The temporal variation in the cumulative effects of daily excess heat hourly (DEHH) on schizophrenia hospitalizations after dividing the time period as 4 years.


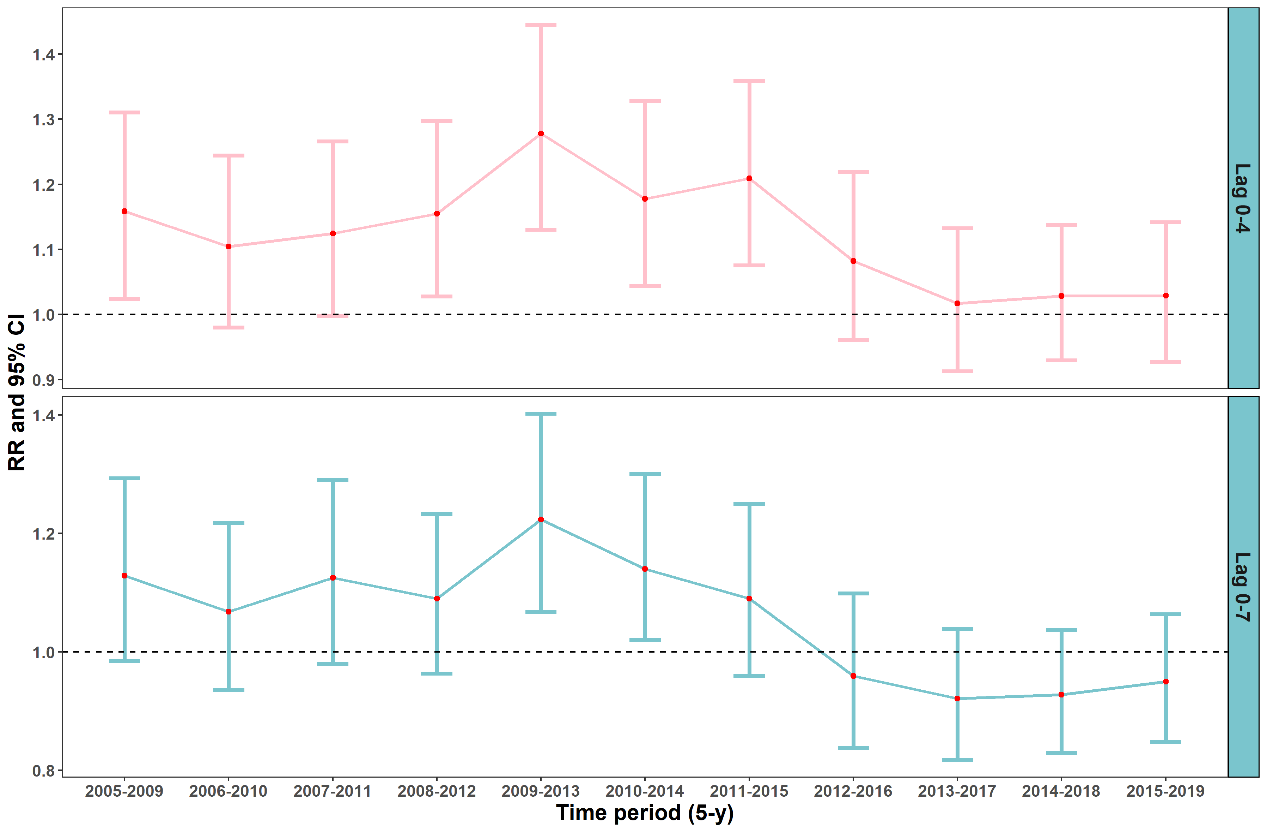


**Fig. 6.** The temporal variation in the cumulative effects of daily excess heat hourly (DEHH) on schizophrenia hospitalizations after dividing the time period as 5 years.

**Table 1.** Cumulative relative risk (RR) estimates of daily excess heat hourly (DEHH) on total hospitalization for schizophrenia at lag 0-4 and lag 0-7 in time-stratified study.

| Time period | Relative risks (95% confidence interval) | |
| --- | --- | --- |
| Lag 0-4 | Lag 0-7 |
| 2005-2007 | 1.246 (1.029, 1.510) | 1.251(0.984,1.590) |
| 2006-2008 | 1.212(1.014,1.448) | 1.127(0.916,1.388) |
| 2007-2009 | 1.171(0.988,1.388) | 1.152(0.944,1.406) |
| 2008-2010 | 1.131(0.941,1.358) | 1.085(0.880,1.338) |
| 2009-2011 | 1.390(1.123,1.720) | 1.478(1.117,1.954) |
| 2010-2012 | 1.392(1.152,1.683) | 1.505(1.186,1.909) |
| 2011-2013 | 1.411(1.177,1.692) | 1.409(1.129,1.758) |
| 2012-2014 | 1.220(1.010,1.474) | 1.148(0.910,1.449) |
| 2013-2015 | 1.281(1.057,1.552) | 1.106(0.857,1.428) |
| 2014-2016 | 1.117(0.932,1.338) | 1.010(0.784,1.300) |
| 2015-2017 | 1.008(0.857,1.186) | 0.926(0.748,1.148) |
| 2016-2018 | 0.982(0.836,1.152) | 1.002(0.813,1.235) |
| 2017-2019 | 1.076(0.930,1.244) | 1.088(0.911,1.299) |

**Table 2.** Relative risks (RRs) estimates of temperature observation time on heat-schizophrenia relationships in warm season during study period from lag1 to lag 5.

| Time | Relative risks (95% confidence interval) | | | | |
| --- | --- | --- | --- | --- | --- |
| Lag 1 | Lag 2 | Lag 3 | Lag 4 | Lag 5 |
| 0 a.m. | 1.034(1.013,1.054) | 1.031(1.014,1.047) | 1.025(1.005,1.040) | 1.017(0.995,1.038) | 1.005(0.988,1.021) |
| 1 a.m. | 1.036(1.017,1.055) | 1.029(1.014,1.045) | 1.024(1.010,1.039) | 1.012(0.993,1.032) | 1.002(0.987,1.021) |
| 2 a.m. | 1.038(1.018,1.058) | 1.038(1.022,1.054) | 1.034(1.013,1.042) | 1.025(1.004,1.047) | 1.010(1.001,1.027) |
| 3 a.m. | 1.041(1.021,1.062) | 1.033(1.016,1.050) | 1.024(1.007,1.043) | 1.014(0.992,1.037) | 1.004(0.987,1.021) |
| 4 a.m. | 1.041(1.021,1.061) | 1.033(1.017,1.050) | 1.025(1.000,1.041) | 1.016(0.994,1.038) | 1.005(0.989,1.022) |
| 5 a.m. | 1.045(1.025,1.066) | 1.040(1.024,1.057) | 1.033(1.012,1.045) | 1.023(1.001,1.045) | 1.010(0.993,1.026) |
| 6 a.m. | 1.039(1.019,1.059) | 1.035(1.018,1.052) | 1.029(1.0151.051) | 1.020(0.998,1.042) | 1.008(0.991,1.024) |
| 7 a.m. | 1.032(1.010,1.051) | 1.029(1.011,1.044) | 1.024(1.011,1.044) | 1.016(0.996,1.037) | 1.005(0.990,1.021) |
| 8 a.m. | 1.033(1.009,1.053) | 1.028(1.010,1.049) | 1.030(0.999.1.051) | 1.022(1.002,1.043) | 1.009(0.993,1.025) |
| 9 a.m. | 1.027(1.009,1.052) | 1.026(1.009,1.047) | 1.027(1.008,1.047) | 1.019(1.000,1.038) | 1.007(0.991,1.022) |
| 10 a.m. | 1.030(1.011,1.050) | 1.027(1.005,1.042) | 1.022(1.004,1.040) | 1.014(0.996,1.032) | 1.003(0.988,1.018) |
| 11 a.m. | 1.028(1.008,1.048) | 1.032(1.008,1.038) | 1.031(1.013,1.050) | 1.024(1.006,1.042) | 1.010(0.995,1.025) |
| 12 a.m. | 1.025(1.004,1.045) | 1.024(1.002,1.039) | 1.021(1.001,1.039) | 1.015(0.997,1.032) | 1.006(0.991,1.022) |
| 1 p.m. | 1.024(1.005,1.043) | 1.019(1.002,1.036) | 1.018(1.001,1.035) | 1.013(0.996,1.030) | 1.005(0.991,1.019) |
| 2 p.m. | 1.025(1.005,1.045) | 1.020(1.003,1.033) | 1.011(1.000,1.038) | 1.014(0.997,1.032) | 1.005(0.990,1.020) |
| 3 p.m. | 1.027(1.007,1.047) | 1.022(1.004,1.036) | 1.018(1.010,1.046) | 1.018(1.004,1.031) | 1.010(0.995,1.026) |
| 4 p.m. | 1.020(1.002,1.039) | 1.019(1.002,1.034) | 1.015(1.008,1.042) | 1.020(1.004,1.038) | 1.010(0.996,1.025) |
| 5 p.m. | 1.016(1.001,1.036) | 1.018(1.003,1.038) | 1.016(1.008,1.044) | 1.014(1.005,1.032) | 1.013(0.998,1.031) |
| 6 p.m. | 1.026(1.005,1.047) | 1.019(1.010,1.043) | 1.018(1.000,1.043) | 1.021(1.002,1.035) | 1.014(0.998,1.027) |
| 7 p.m. | 1.024(1.006,1.043) | 1.020(1.002,1.046) | 1.016(0.999,1.038) | 1.017(0.997,1.042) | 1.012(0.998,1.027) |
| 8 p.m. | 1.024(1.005,1.044) | 1.021(1.004,1.041) | 1.015(1.003,1.044) | 1.020(1.003,1.034) | 1.017(0.999,1.033) |
| 9 p.m. | 1.033(1.012,1.054) | 1.018(1.003,1.042) | 1.013(1.001,1.046) | 1.025(1.005,1.032) | 1.011(0.995,1.027) |
| 10 p.m. | 1.018(1.002,1.037) | 1.017(1.001,1.048) | 1.016(1.002,1.047) | 1.018(1.004,1.039) | 1.011(0.996,1.026) |
| 11 p.m. | 1.028(1.008,1.049) | 1.016(1.002,1.039) | 1.019(1.001,1.045) | 1.016(0.996,1.036) | 1.017(0.999,1.034) |

**Table 3.** Relative risk (RR) estimates of each increment of interquartile range (IQR, 129.8°C) in daily excess heat hourly (DEHH) on schizophrenia hospitalizations after adjusting for the daily mean concentrations of pollutants during the warm season from 2005-2019 in Hefei, China.

| Lag Days | Relative risks (95% confidence interval) | | | | | |
| --- | --- | --- | --- | --- | --- | --- |
| No pollutant | Add PM2.5 | Add NO2 | Add SO2 | Add CO | Add O3 |
| Lag 0 | 1.042(0.976,1.112) | 1.041 (0.973,1.113) | 1.041 (0.974,1.112) | 1.041 (0.973,1.112) | 1.043 (0.976,1.116) | 1.043(0.976,1.115) |
| Lag 1 | 1.045 (1.002,1.089) | 1.045 (1.001,1.091) | 1.043 (1.001,1.089) | 1.045 (1.001,1.091) | 1.047 (1.003,1.093) | 1.047(1.003,1.092) |
| Lag 2 | 1.044 (1.011,1.081) | 1.047 (1.011,1.084) | 1.043 (1.008,1.080) | 1.047 (1.011,1.083) | 1.047 (1.012,1.084) | 1.047(1.012,1.084) |
| Lag 3 | 1.040 (1.002,1.081) | 1.043 (1.003,1.084) | 1.038 (1.001,1.079) | 1.042 (1.003,1.083) | 1.042 (1.003,1.083) | 1.042(1.003,1.083) |
| Lag 4 | 1.027 (0.989,1.067) | 1.030 (0.990,1.070) | 1.026 (0.987,1.067) | 1.029 (0.990,1.070) | 1.029 (0.990,1.070) | 1.029(0.990,1.070) |
| Lag 5 | 1.007 (0.973,1.041) | 1.008 (0.974,1.043) | 1.007 (0.973,1.043) | 1.008 (0.974,1.043) | 1.008 (0.974,1.043) | 1.008(0.974,1.043) |
| Lag 6 | 0.981 (0.944,1.020) | 0.982 (0.944,1.021) | 0.984 (0.946,1.024) | 0.981 (0.943,1.021) | 0.982 (0.944,1.021) | 0.982(0.943,1.022) |
| Lag 7 | 0.954 (0.899,1.012) | 0.953 (0.897,1.013) | 0.959 (0.903,1.019) | 0.953 (0.896,1.012) | 0.954 (0.898,1.013) | 0.954(0.897,1.014) |
